# Supplementary material for: Effectiveness of a transdiagnostic individually tailored Internet-based and mobile-supported intervention for the indicated prevention of depression and anxiety (ICare Prevent) in Dutch college students: study protocol for a randomised controlled trial
Source: PubMed Central journal article supplement (PMC5819200; doi:10.1186/s13063-018-2477-y), 2018-02-20
Supplement: 13063_2018_2477_MOESM2_ESM.pdf [file 13063_2018_2477_MOESM2_ESM.pdf]

SPIRIT Figure. Schedule of screening/enrolment, interventions, and assessments.

| TIMEPOINT                                      | STUDY PERIOD         |       |                 |       |       |           |       |
|------------------------------------------------|----------------------|-------|-----------------|-------|-------|-----------|-------|
|                                                | Screening/enrollment |       | Post-allocation |       |       | Follow-up |       |
|                                                | $-t_1$               | $t_0$ | $t_1$           | $t_2$ | $t_3$ | $t_4$     | $t_5$ |
| <b>SCREENING AND ENROLMENT:</b>                |                      |       |                 |       |       |           |       |
| Informed consent (before eligibility screen)   | X                    |       |                 |       |       |           |       |
| Eligibility screen                             | X                    |       |                 |       |       |           |       |
| Enrollment                                     |                      | X     |                 |       |       |           |       |
| <b>INTERVENTIONS:</b>                          |                      |       |                 |       |       |           |       |
| <i>Guided ICare Prevent</i>                    |                      |       | ↔               |       |       |           |       |
| <i>Unguided ICare Prevent</i>                  |                      |       | ↔               |       |       |           |       |
| <i>CAU</i>                                     |                      |       | X               | X     | X     |           |       |
| <b>ASSESSMENTS:</b>                            |                      |       |                 |       |       |           |       |
| <i>Depression (CES-D)</i>                      | X                    |       |                 |       |       |           |       |
| <i>Depression (QIDS)</i>                       | X                    |       |                 |       | X     | X         | X     |
| <i>Depression (PHQ-9)</i>                      |                      |       | X               | X     | X     | X         | X     |
| <i>Anxiety (GAD-7)</i>                         | X                    |       |                 | X     | X     | X         | X     |
| <i>Anxiety (SIGH-A)</i>                        | X                    |       |                 |       | X     | X         | X     |
| <i>Demographic data</i>                        | X                    |       |                 |       |       |           |       |
| <i>Mental disorder diagnosis self-reported</i> | X                    |       |                 |       |       |           |       |
| <i>Experience with psychotherapy</i>           | X                    |       |                 |       |       |           |       |
| <i>Clinical diagnosis (M.I.N.I.)</i>           | X                    |       |                 |       |       | X         | X     |
| <i>Academic performance (PSS, ECTS)</i>        |                      |       | X               | X     | X     | X         | X     |
| <i>Costs (CSRI)</i>                            |                      |       | X               |       |       | X         | X     |

|                                                |  |   |   |   |   |   |
|------------------------------------------------|--|---|---|---|---|---|
| <b>Alcohol use (AUDIT-C)</b>                   |  | X | X | X | X | X |
| <b>Alliance (WAI-SR) **</b>                    |  |   | X |   |   |   |
| <b>Behavioral activation (BADSF)</b>           |  | X |   | X | X | X |
| <b>Reasons for dropout **</b>                  |  |   |   | X |   |   |
| <b>Expectations (CEQ)</b>                      |  | X |   |   |   |   |
| <b>Incongruence (INKK)</b>                     |  | X |   | X | X | X |
| <b>Motivation (TEQ)</b>                        |  | X | X | X |   |   |
| <b>Negative effects of treatment (INEP) **</b> |  |   |   | X |   |   |
| <b>Personality (BFI-10)</b>                    |  | X |   |   |   |   |
| <b>Potential risk factors *</b>                |  | X |   |   |   |   |
| <b>Program evaluation (CSQ-8) **</b>           |  |   | X | X |   |   |
| <b>Quality of life (AQoL, EQ-5D-8L)</b>        |  | X |   | X | X | X |
| <b>Resilience (CD-RISC)</b>                    |  | X | X | X | X | X |
| <b>Sleep quality (PSQI)</b>                    |  | X |   | X | X | X |
| <b>Support **</b>                              |  |   | X |   |   |   |
| <b>Wellbeing (WHO-5)</b>                       |  | X |   | X | X | X |
| <b>Worry (PSWQ-3)</b>                          |  | X |   | X | X | X |

*Note.* t<sub>1</sub>= Informed consent and subsequent screening; t<sub>0</sub>= Enrollment; t<sub>1</sub>= Baseline; t<sub>2</sub>= after completion of session 5 or 5 weeks after randomisation; t<sub>3</sub>= Post-intervention, t<sub>4</sub>= 6 month follow-up; t<sub>5</sub>= 12 month follow-up

\*= optional; \*\* = only in intervention groups
